# Supplementary material for: Estimation of acute and chronic Q fever incidence in children during a three-year outbreak in the Netherlands and a comparison with international literature
Source: PubMed Central journal article supplement (PMC4575485; doi:10.1186/s13104-015-1389-0), 2015-09-18

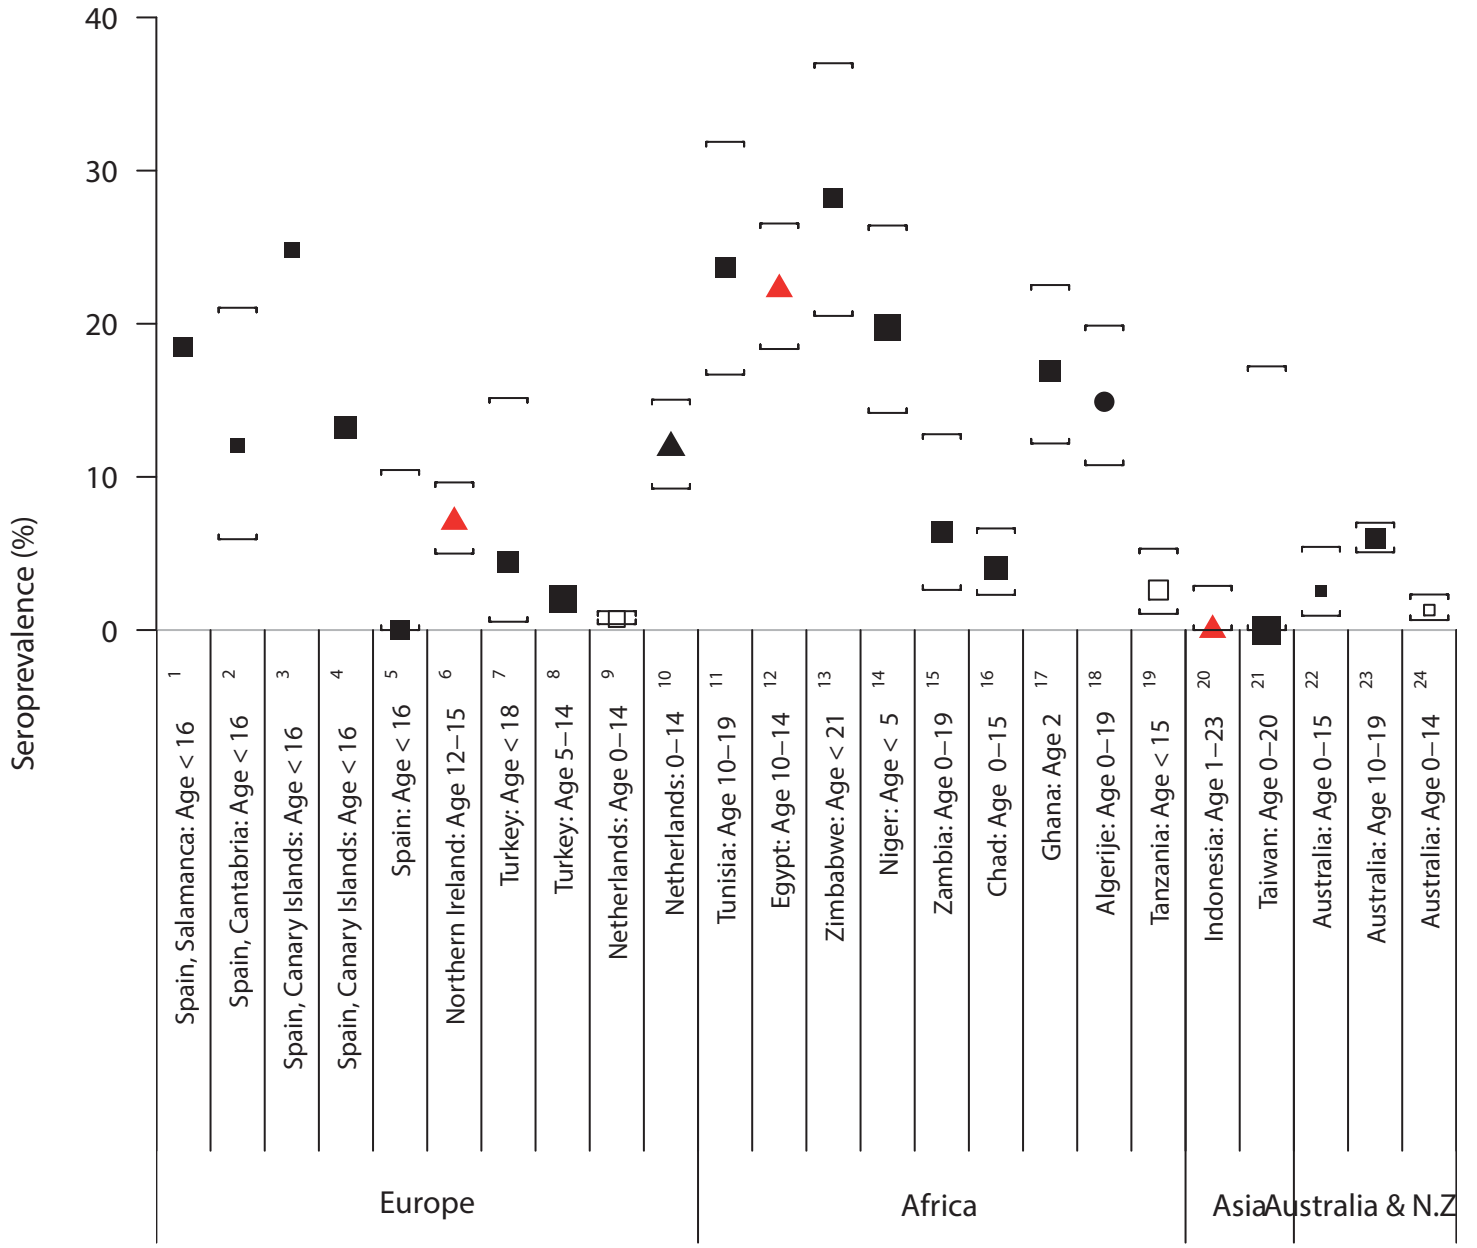

Supplement: 13104_2015_1389_MOESM1_ESM.pdf [file 13104_2015_1389_MOESM1_ESM.pdf]
